# Supplementary material
Source: MDPI journal article supplement (https://www.mdpi.com/2079-6412/11/11/1366)
Supplement: s1 [file s1]

# Supplementary Materials: Sustainable antimicrobial and antioxidant coating for improving postharvest shelf-life of pineapple

Indra Bhusan Basumatary <sup>1</sup>, Avik Mukherjee <sup>1</sup>, Vimal Katiyar <sup>2</sup>, Santosh Kumar <sup>1,\*</sup> and Joydeep Dutta <sup>3,\*</sup>

<sup>1</sup> Department of Food Engineering and Technology, Central Institute of Technology Kokrajhar, Kokrajhar 783370, Assam, India; 023indra@gmail.com (I.B.B.); ak.mukherjee@cit.ac.in (A.M.)

<sup>2</sup> Department of Chemical Engineering, Indian Institute of Technology Guwahati, Guwahati 781039, Assam, India; vkatiyar@iitg.ac.in

<sup>3</sup> Functional Materials, Department of Applied Physics, School of Engineering Sciences, KTH Royal Institute of Technology, AlbaNova Universitets Centrum, 106 91 Stockholm, Sweden

\* Correspondence: s.kumar@cit.ac.in (S.K.); joydeep@kth.se (J.D.)

**Citation:** Basumatary, I.B.; Mukherjee, A.; Katiyar, V.; Kumar, S.; Dutta, J. Chitosan-Based Antimicrobial Coating for Improving Postharvest Shelf Life of Pineapple. *Coatings* **2021**, *11*, 1366. <https://doi.org/10.3390/coatings11111366>

Academic Editor:  
Alexandra Muñoz-Bonilla

Received: 24 October 2021  
Accepted: 2 November 2021  
Published: 8 November 2021

**Publisher's Note:** MDPI stays neutral with regard to jurisdictional claims in published maps and institutional affiliations.

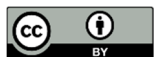

**Copyright:** © 2021 by the authors. Licensee MDPI, Basel, Switzerland. This article is an open access article distributed under the terms and conditions of the Creative Commons Attribution (CC BY) license (<http://creativecommons.org/licenses/by/4.0/>).

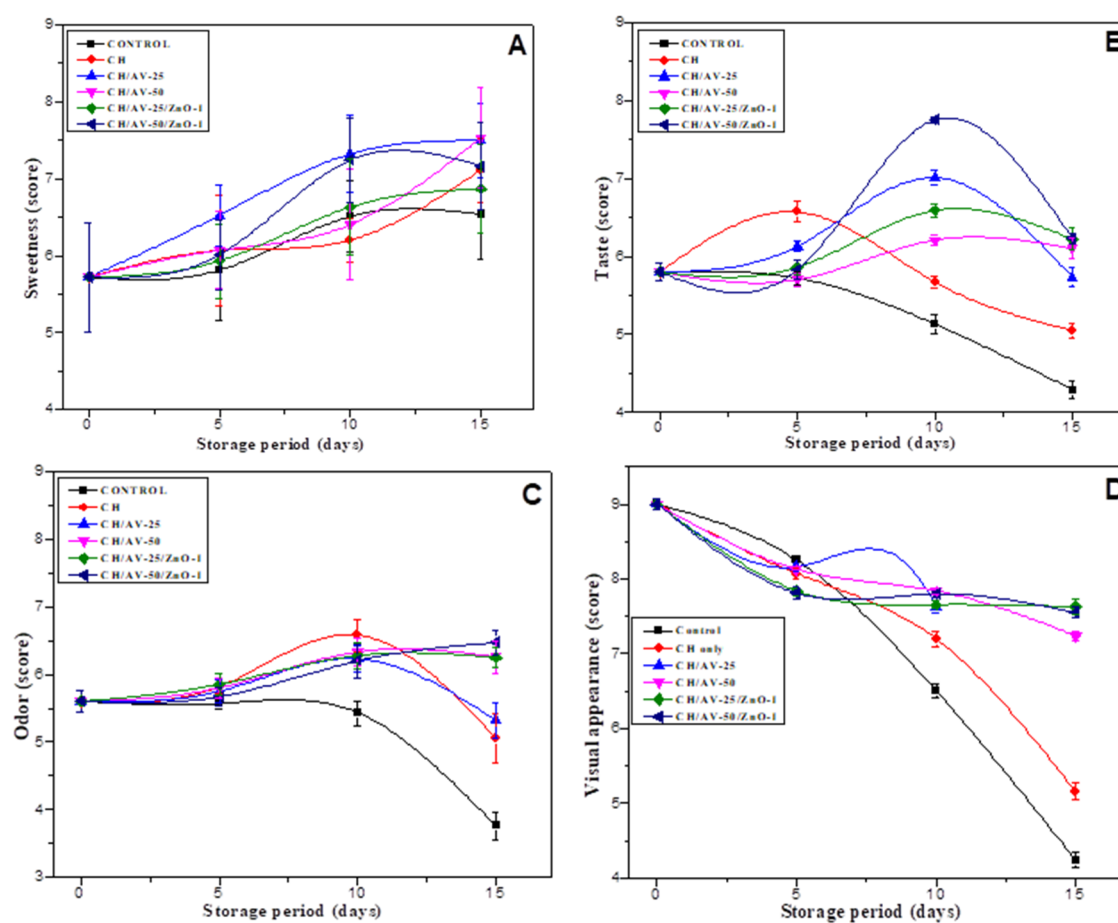

**Figure S1.** Effects of coating formulations on sensory attribute scores; (A) sweetness, (B) taste, (C) odor, and (D) visual appearance of the treated and untreated pineapple fruit during 15-days storage at ambient condition.

**Table S1.** Values of weight loss, total soluble solid (TSS), titratable acidity (TA), and maturity index (TSS/TA) of the coated and uncoated pineapple fruits during storage for 15 days at ambient condition.

| Parameter       | Storage Period (days) | Treatments                   |                             |                             |                             |                             |                             |
|-----------------|-----------------------|------------------------------|-----------------------------|-----------------------------|-----------------------------|-----------------------------|-----------------------------|
|                 |                       | Control                      | CH only                     | CH/AVG-25                   | CH/AVG-50                   | CH/AVG-25/ZnO-1             | CH/AVG-50/ZnO-1             |
| Weight loss (%) | 0                     | 0 ± 0 <sup>aA</sup>          | 0 ± 0 <sup>aA</sup>         | 0 ± 0 <sup>aA</sup>         | 0 ± 0 <sup>aA</sup>         | 0 ± 0 <sup>aA</sup>         | 0 ± 0 <sup>aA</sup>         |
|                 | 5                     | 5.41 ± 0.32 <sup>abB</sup>   | 4.19 ± 0.81 <sup>bb</sup>   | 4.38 ± 0.82 <sup>abB</sup>  | 6.05 ± 1.14 <sup>abB</sup>  | 5.65 ± 1.11 <sup>abB</sup>  | 5.16 ± 0.49 <sup>abB</sup>  |
|                 | 10                    | 10.63 ± 0.12 <sup>aC</sup>   | 10.19 ± 0.71 <sup>a</sup>   | 9.45 ± 0.69 <sup>abC</sup>  | 9.06 ± 0.97 <sup>bC</sup>   | 9.65 ± 1.07 <sup>abC</sup>  | 8.68 ± 1.13 <sup>bC</sup>   |
|                 | 15                    | 16.60 ± 0.21 <sup>aD</sup>   | 14.41 ± 1.04 <sup>abD</sup> | 13.23 ± 0.64 <sup>bdD</sup> | 11.56 ± 0.52 <sup>cD</sup>  | 13.25 ± 0.34 <sup>bdD</sup> | 11.4 ± 0.12 <sup>cD</sup>   |
| TSS (%)         | 0                     | 11.51 ± 0.27 <sup>aA</sup>   | 11.51 ± 0.18 <sup>aA</sup>  | 11.51 ± 0.14 <sup>aA</sup>  | 11.51 ± 0.17 <sup>aA</sup>  | 11.51 ± 0.11 <sup>aA</sup>  | 11.51 ± 0.08 <sup>aA</sup>  |
|                 | 5                     | 13.52 ± 0.16 <sup>aB</sup>   | 15.01 ± 0.12 <sup>bb</sup>  | 13.82 ± 0.11 <sup>aB</sup>  | 12.53 ± 0.13 <sup>bB</sup>  | 12.52 ± 0.17 <sup>bB</sup>  | 12.5 ± 0.12 <sup>bB</sup>   |
|                 | 10                    | 13.44 ± 0.12 <sup>bcB</sup>  | 14.72 ± 0.13 <sup>aB</sup>  | 13.22 ± 0.11 <sup>bcB</sup> | 12.73 ± 0.11 <sup>bB</sup>  | 13.11 ± 0.12 <sup>bcB</sup> | 12.86 ± 0.12 <sup>bcB</sup> |
|                 | 15                    | 14.47 ± 0.82 <sup>aB</sup>   | 13.62 ± 0.11 <sup>aB</sup>  | 12.22 ± 0.09 <sup>cC</sup>  | 12.71 ± 0.11 <sup>bcB</sup> | 11.83 ± 0.12 <sup>cC</sup>  | 11.52 ± 0.12 <sup>cC</sup>  |
| TA (%)          | 0                     | 0.71 ± 0.04 <sup>aA</sup>    | 0.71 ± 0.04 <sup>aA</sup>   | 0.71 ± 0.03 <sup>aA</sup>   | 0.71 ± 0.03 <sup>aA</sup>   | 0.71 ± 0.02 <sup>aA</sup>   | 0.71 ± 0.04 <sup>aA</sup>   |
|                 | 5                     | 0.66 ± 0.02 <sup>aAB</sup>   | 0.66 ± 0.04 <sup>aAB</sup>  | 0.67 ± 0.02 <sup>aAB</sup>  | 0.69 ± 0.04 <sup>aAB</sup>  | 0.68 ± 0.03 <sup>aAB</sup>  | 0.69 ± 0.03 <sup>aAB</sup>  |
|                 | 10                    | 0.63 ± 0.04 <sup>aAB</sup>   | 0.64 ± 0.02 <sup>aAB</sup>  | 0.64 ± 0.03 <sup>aAB</sup>  | 0.66 ± 0.02 <sup>aAB</sup>  | 0.65 ± 0.03 <sup>aAB</sup>  | 0.65 ± 0.03 <sup>aAB</sup>  |
|                 | 15                    | 0.59 ± 0.02 <sup>aB</sup>    | 0.61 ± 0.03 <sup>aB</sup>   | 0.62 ± 0.04 <sup>aB</sup>   | 0.64 ± 0.03 <sup>aB</sup>   | 0.64 ± 0.04 <sup>aB</sup>   | 0.64 ± 0.04 <sup>aB</sup>   |
| TSS/TA          | 0                     | 16.21 ± 0.64 <sup>aA</sup>   | 16.21 ± 0.55 <sup>aA</sup>  | 16.21 ± 0.93 <sup>aA</sup>  | 16.21 ± 0.49 <sup>aA</sup>  | 16.21 ± 0.57 <sup>aA</sup>  | 16.21 ± 0.07 <sup>aA</sup>  |
|                 | 5                     | 20.48 ± 0.92 <sup>abB</sup>  | 22.74 ± 0.71 <sup>aB</sup>  | 20.62 ± 0.85 <sup>abB</sup> | 18.15 ± 0.14 <sup>baB</sup> | 18.41 ± 0.93 <sup>baB</sup> | 18.11 ± 0.41 <sup>bb</sup>  |
|                 | 10                    | 21.33 ± 0.71 <sup>abBC</sup> | 23.12 ± 0.66 <sup>aB</sup>  | 20.65 ± 0.12 <sup>bb</sup>  | 19.29 ± 0.75 <sup>bb</sup>  | 20.17 ± 0.43 <sup>bb</sup>  | 19.78 ± 0.83 <sup>bb</sup>  |
|                 | 15                    | 24.52 ± 0.45 <sup>aC</sup>   | 22.71 ± 0.72 <sup>abB</sup> | 19.71 ± 0.87 <sup>bb</sup>  | 19.86 ± 0.86 <sup>bb</sup>  | 18.48 ± 0.73 <sup>baB</sup> | 18.01 ± 0.11 <sup>bb</sup>  |

The values are expressed as means ± SD of triplicate assays, and the lower case and upper case letters in superscript with the values indicate they are significantly different by LSD at P < 0.05 between treatments in columns and storage time in rows, respectively.
